# Supplementary material for: Regulation of IL-33 by Oncostatin M in Mouse Lung Epithelial Cells
Source: Hindawi journal article supplement (doi:10.1155/2016/9858374), 2016-01-01
Supplement: f1 [file 9858374.f1.pdf]

## Supplemental figure 1

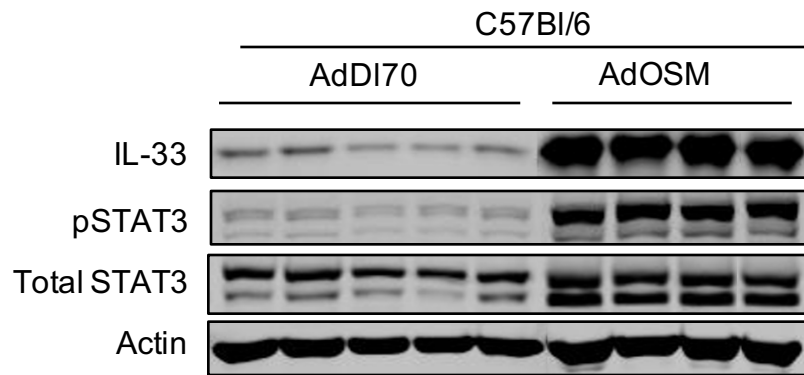

**AdOSM induction of IL-33 and phospho-STAT3(pSTAT3) in C57Bl/6 mice.** C57Bl/6 mice were culled after 7 days of an endotracheal administration of AdDI70 (n=5) or AdOSM (n=4) vectors and lung tissue was prepared for protein analysis as described in Methods. Lung tissue homogenate protein samples were probed for IL-33, pSTAT3, total STAT3, and  $\beta$ -actin as indicated.

## Supplemental figure 2

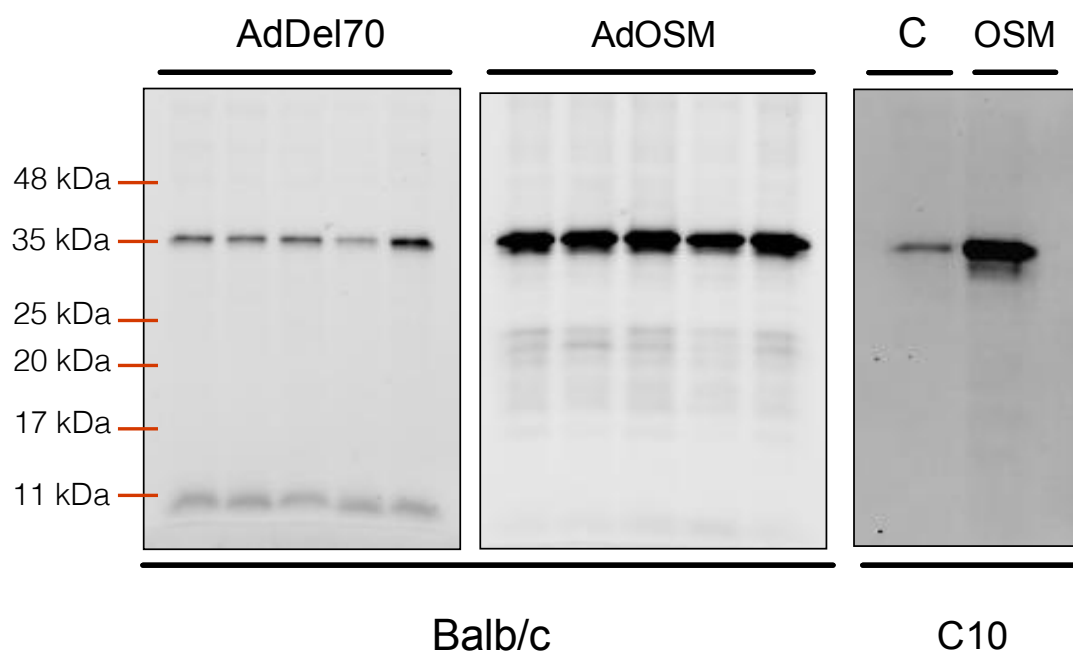

**Immunoblot analysis detects primarily full length pro-IL-33.** Lung tissue homogenate protein from Balb/C mice treated with AdDel70 or AdOSM vector (left and middle panel), or C10 alveolar epithelial cell protein lysates (right panel) from unstimulated (C) or OSM-stimulated cells (treated with 5 ng/ml OSM for 24 hours) were probed for IL-33 following electrophoretic separation of protein on a 12% SDS-PAGE gel.

## Supplemental figure 3

### IHC of C10 AEC in culture 24hr

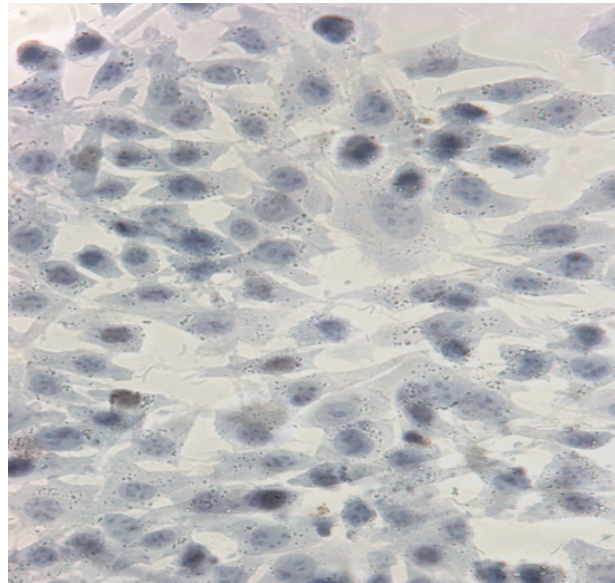

- OSM

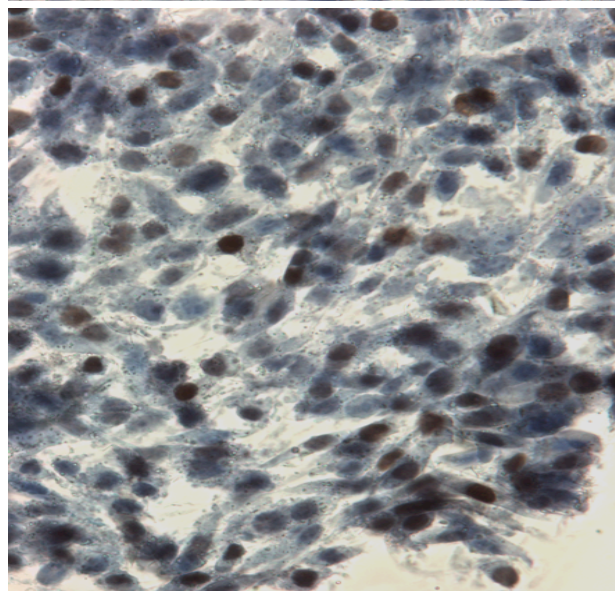

+ OSM (10ng/ml)

**OSM stimulation of C10 cells in vitro increases nuclear staining of IL-33.** C10 alveolar epithelial cells (AEC) were left unstimulated (-OSM) or stimulated with OSM (10ng/ml) for 24 hours, fixed and stained for IL-33 by immunohistochemistry, as described in Methods.

## Supplemental Figure 4

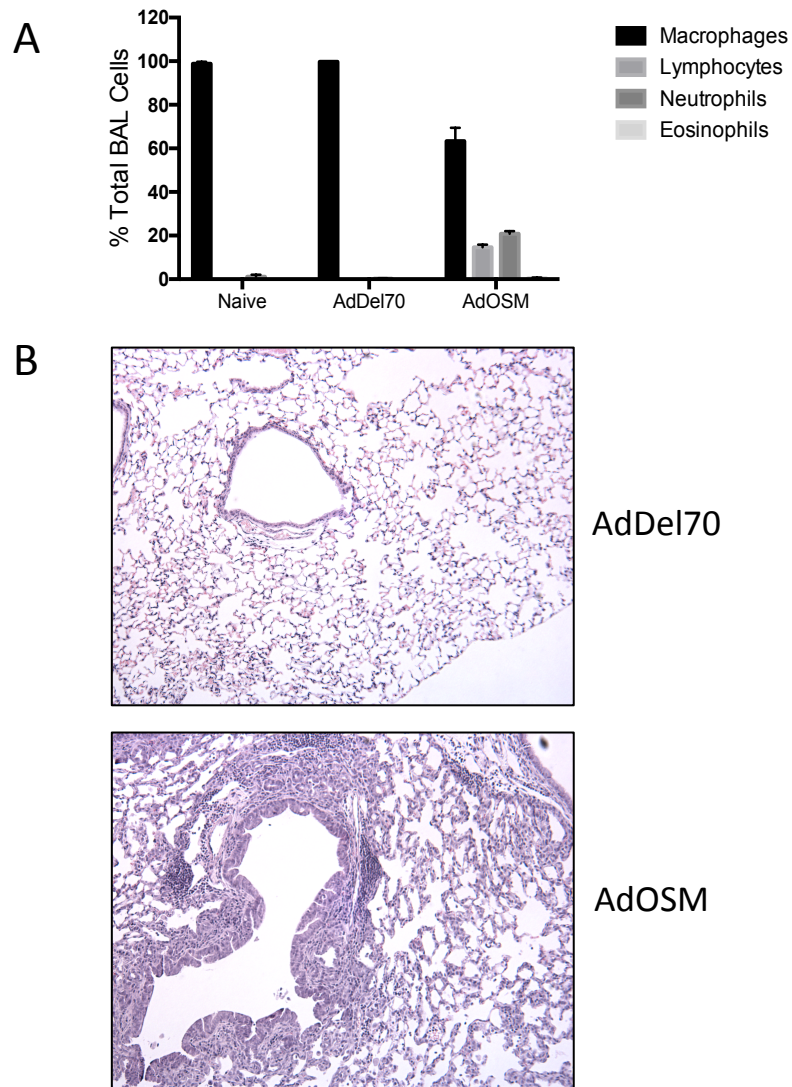

**AdOSM induces cell accumulation and pathology in BALB/c mouse lung. A)** Balb/C mice were treated with AdDel70 or AdOSM vector and culled after 7 days (n=3, +/- SEM) A) BAL fluid cells were analysed by differential counting as previous [31] and showed increased percentage of neutrophils and lymphocytes as previously published in BALB/c [31]. (B) Representative images of histological sections stained with H&E are shown from AdDel70 or AdOSM treated BALB/c mice as indicated (50x power).
